# Supplementary material for: Phenol-selective mass spectrometric analysis of jet fuel
Source: Royal Society of Chemistry journal article supplement (doi:10.1039/c7an00908a), 2017-01-01
Supplement: c7an00908a1.pdf [file c7an00908a1.pdf]

**Supporting Information**

**for**

**Phenol-selective mass spectrometric analysis of petroleum fractions**

Haoxuan Zhu,<sup>a</sup> Eric Janusson,<sup>a</sup> Jingwei Luo,<sup>a</sup> James Piers,<sup>a</sup> Farhana Islam,<sup>a</sup> Bryce McGarvey,<sup>b</sup>  
Allen G. Oliver,<sup>c</sup> Ori Granot,<sup>a</sup> J. Scott McIndoe<sup>a\*</sup>

*a. Department of Chemistry, University of Victoria, PO Box 1700 STN CSC, Victoria, BC V8W 2Y2,  
Canada. Fax: +1 (250) 721-7147; Tel: +1 (250) 721-7181; E-mail: [mcindoe@uvic.ca](mailto:mcindoe@uvic.ca)*

*b. Imperial Oil Products and Chemicals Division, 453 Christina Street South,  
Sarnia, ON N7T 8C8, Canada.*

*c. Molecular Structure Facility, Department of Chemistry and Biochemistry, University of Notre Dame,  
Notre Dame, Indiana 46556, United States.*

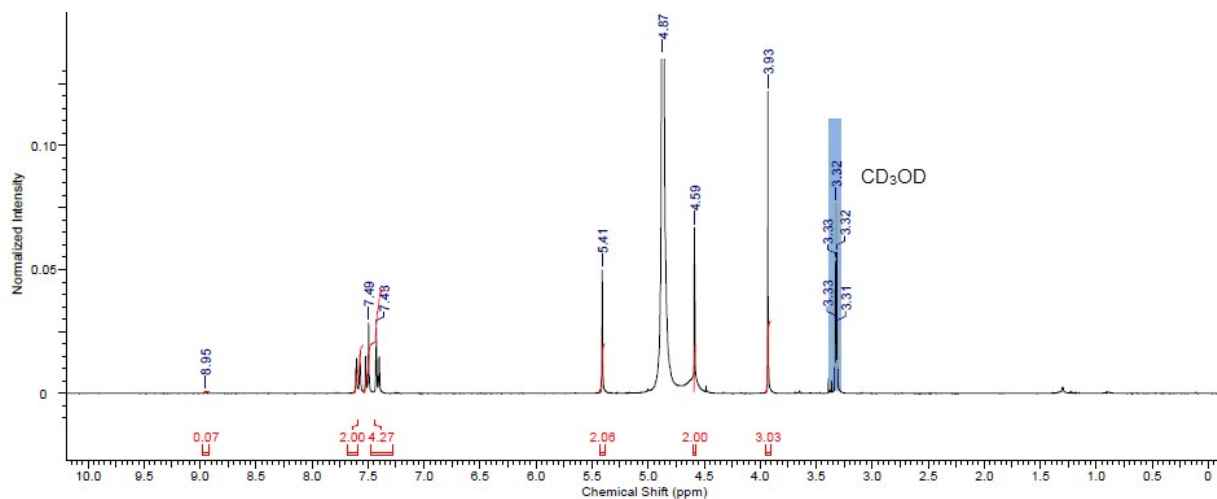

**Figure S1.**  $^1\text{H}$  NMR (300 MHz,  $\text{CD}_3\text{OD}$ ) spectra of 3-(4-(bromomethyl)benzyl)-1-methylimidazolium hexafluorophosphate,  $\text{CD}_3\text{OD}$  solvent. 298 K.

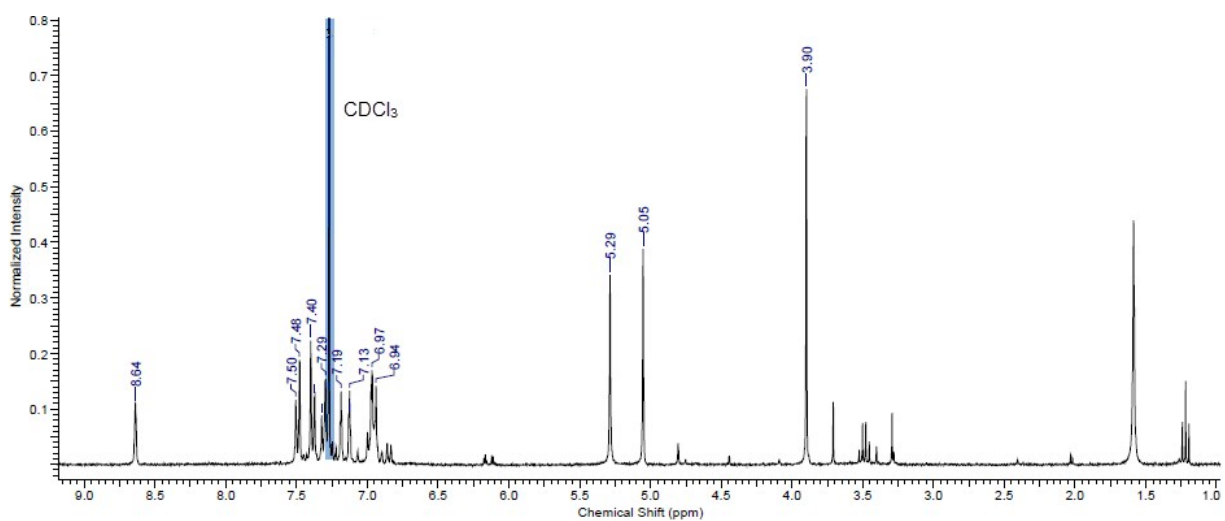

**Figure S2.**  $^1\text{H}$  NMR (300 MHz,  $\text{CDCl}_3$ ) spectra of 1-methyl-3-(4-(phoxymethyl)benzyl)-1H-imidazol-3-ium hexafluorophosphate(V),  $\text{CDCl}_3$  solvent. 298 K.

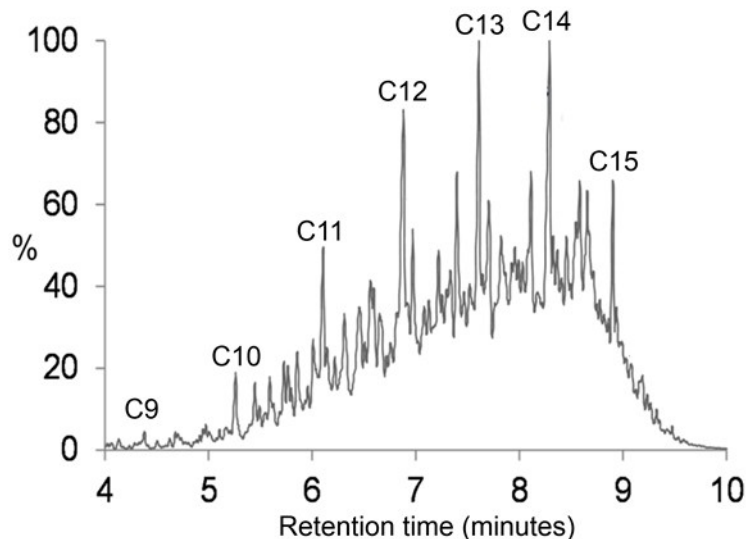

**Figure S3.** Cold EI GC/MS chromatogram of untreated jet fuel sample A. Major peaks are labelled with carbon number and correspond to the alkane (e.g. C13 = C<sub>13</sub>H<sub>28</sub>). Peak assignments were made using library matching. Phenols could not be identified in any of the sample studied.

GC/MS separates components of a mixture prior to analysis, and in the case of the jet fuel, the principal components are saturated hydrocarbons C<sub>n</sub>H<sub>2n+2</sub> ( $n = 9-16$ , Figure S 3). Nonane boils at 151°C and pentadecane at 271°C, so we may expect other hydrocarbons boiling in that range to also be included in the distillation fraction.<sup>1</sup> Predictably, the mixture contains numerous other hydrocarbon products beyond isomers of the hydrocarbons themselves - substituted benzenes and naphthalenes. For example, trimethylbenzenes have boiling points around 170°C, and naphthalene boils at 218°C. At the highest elution times, we observe alkylated naphthalenes. If we consider the phenols likely to appear in the boiling point range 150-270°C, we would expect to see phenol itself (b.p. 182°C) and variously alkylated versions, e.g. 2,5-dimethylphenol (b.p. 212°C). Naphthol sublimates at 288°C, and its alkylated derivatives have boiling points higher than this.

**Table S1.** The boiling points of alkylated phenols.

| R group         | Number of R group | Mol.Wt. of alkylated phenols | Boiling point (°C) |
|-----------------|-------------------|------------------------------|--------------------|
| CH <sub>3</sub> | 0                 | 94.1                         | 182                |
| CH <sub>3</sub> | 1                 | 108.3                        | 191~202            |
| CH <sub>3</sub> | 2                 | 122.2                        | 204~218, 277       |
| CH <sub>3</sub> | 3                 | 136.1                        | 213~249            |
| CH <sub>3</sub> | 4                 | 150.2                        | 224~251            |
| CH <sub>3</sub> | 5                 | 164.2                        | 127, 233~262       |
| CH <sub>3</sub> | 6                 | 178.3                        | 138, 247~262       |
| CH <sub>3</sub> | 7                 | 192.3                        | NA                 |

**Table S2.** The boiling points of thiols.

| R group         | Number of R group | Mol.Wt. of alkylated naphthols | Boiling point (°C) |
|-----------------|-------------------|--------------------------------|--------------------|
| CH <sub>3</sub> | 0                 | 144.2                          | 286                |
| CH <sub>3</sub> | 1                 | 158.1                          | 304                |
| CH <sub>3</sub> | 2                 | 172.1                          | 315                |
| CH <sub>3</sub> | 3                 | 186.1                          | 335                |
| CH <sub>3</sub> | 4                 | 200.2                          | 341~343            |
| CH <sub>3</sub> | 5                 | 214.1                          | 357                |

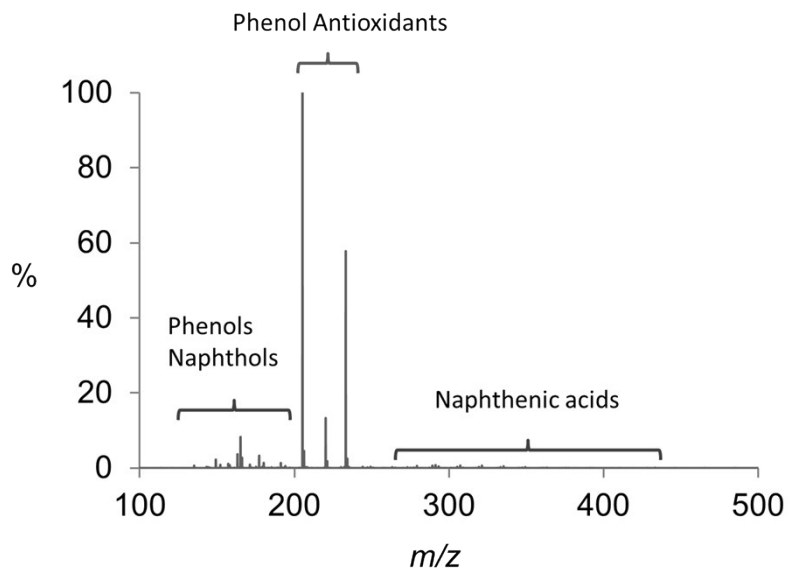

**Figure S4.** Negative ion mode ESI-MS of sample B after reaction with NaOH, Solvent CH<sub>3</sub>CN/CH<sub>2</sub>Cl<sub>2</sub> (v/v=1:3).

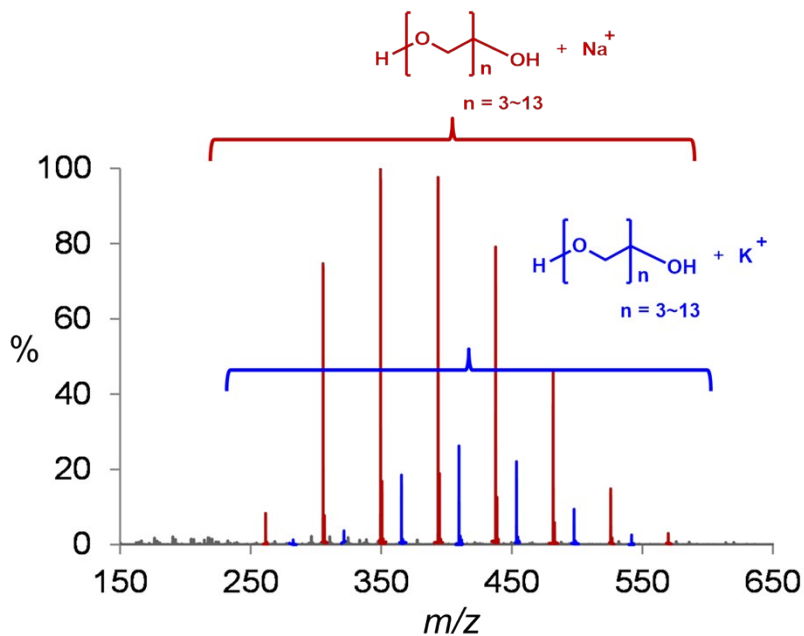

**Figure S5.** Positive ion mode ESI-MS of sample X2 after reaction with NaOH. Solvent CH<sub>3</sub>CN/CH<sub>2</sub>Cl<sub>2</sub> (v/v=1:3). By far the most prominent ions were based on polyethylene glycols.

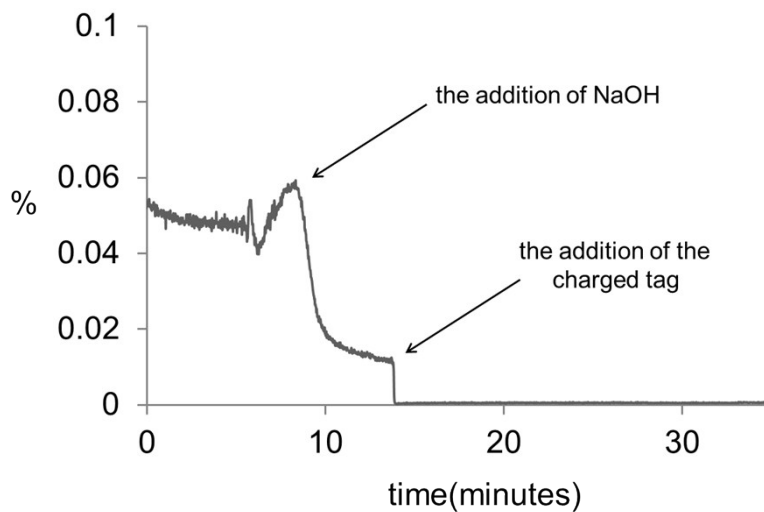

**Figure S6.**  $K^+$  of the charged tag, the addition of charged tag suppresses the appearance of PEG.

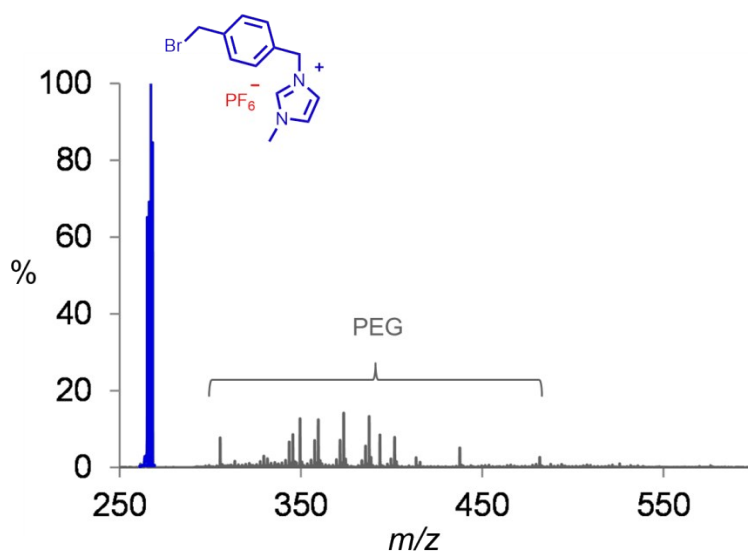

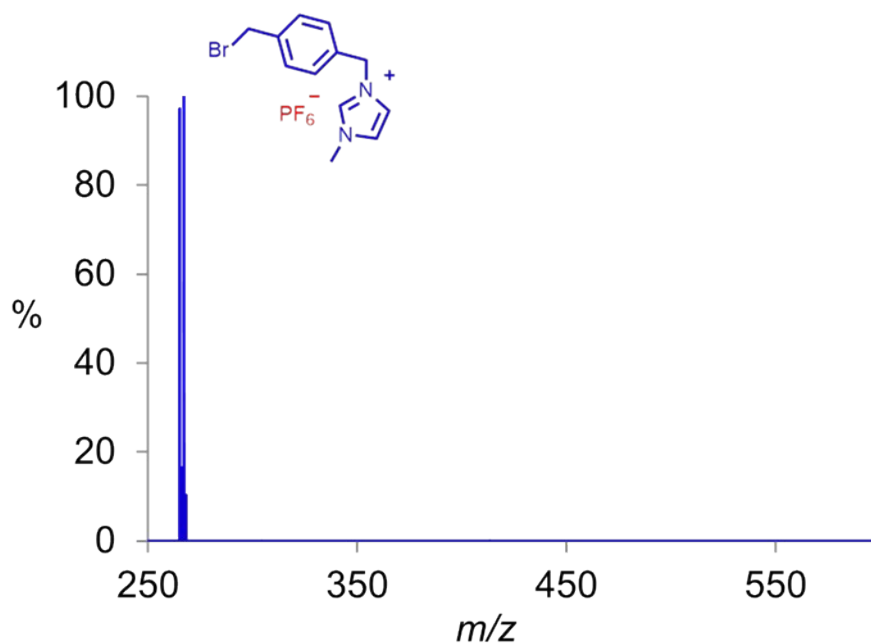

**Figure S7.** The spectrum of the first second of addition of charged tag further illustrates the high surface activity of the charged tag. Sample B reacted with charged tag under the base condition, solvent  $\text{CH}_3\text{CN}/\text{CH}_2\text{Cl}_2$  (v/v=1:3).

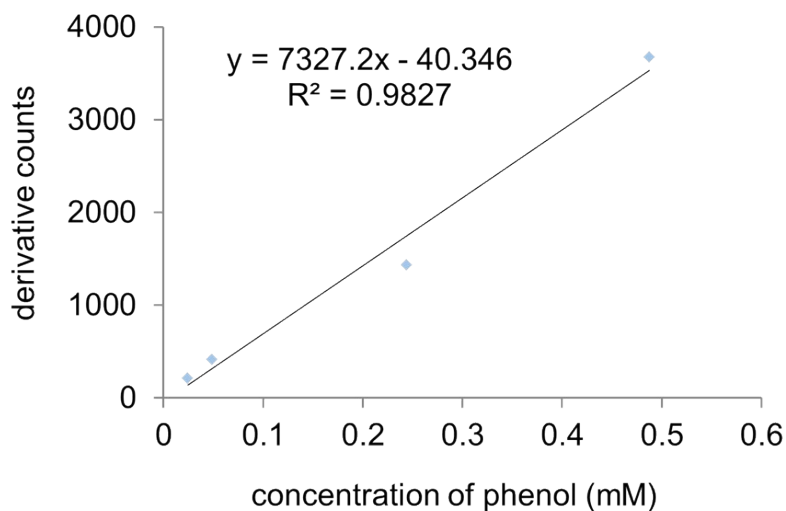

**Figure S8.** Response of derivative following reaction with 0.488 mM charged tag.

The average of baseline noise was determined with a method blank sample including solvent and 0.488 mM of charged tag. The eight samples analyzed in this manuscript did

not exhibit significant background noise at the region of interest ( $m/z$  270  $\sim$   $m/z$  650). The response of derivative compound was found to be linear to micromolar quantities of charged tag. The derivatization process is limited by reactivity and concentration of target analytes in addition to variation in the sample matrix; therefore, the method detection limit defined here is an approximation only and will vary between samples and matrices. The general method limit was established based on a reaction with 0.488 mM of charged tag and phenol (see Equation 1). The response of the lowest identifiable derivative was then used to establish the limit detection (3 times the signal-to-noise ration) and quantitation (10 times the signal-to-noise ratio) for the jet fuel samples. The limit of detection for phenol product was examined and found to be 18 counts (8.0  $\mu$ M) with a limit of quantitation of 60 counts (26.7  $\mu$ M).

**Table S3. The orbitrap result of series 1.**

| <b>N</b> | <b>Experimental m/z</b> | <b>Calculated m/z</b> | <b>Composition</b>                               | <b>Accuracy (ppm)</b> |
|----------|-------------------------|-----------------------|--------------------------------------------------|-----------------------|
| <b>2</b> | 307.18045               | 307.18104             | C <sub>20</sub> H <sub>23</sub> N <sub>2</sub> O | -1.920691459          |
| <b>3</b> | 321.19610               | 321.19669             | C <sub>21</sub> H <sub>25</sub> N <sub>2</sub> O | -1.836880698          |
| <b>4</b> | 335.21160               | 335.21234             | C <sub>22</sub> H <sub>27</sub> N <sub>2</sub> O | -2.207555963          |
| <b>5</b> | 349.22735               | 349.22799             | C <sub>23</sub> H <sub>29</sub> N <sub>2</sub> O | -1.832613703          |
| <b>6</b> | 363.24297               | 363.24364             | C <sub>24</sub> H <sub>31</sub> N <sub>2</sub> O | -1.844492033          |
| <b>7</b> | 377.25875               | 377.25929             | C <sub>25</sub> H <sub>33</sub> N <sub>2</sub> O | -1.431376282          |
| <b>8</b> | 391.27431               | 391.27494             | C <sub>26</sub> H <sub>35</sub> N <sub>2</sub> O | -1.610121006          |
| <b>9</b> | 405.29011               | 405.29059             | C <sub>27</sub> H <sub>37</sub> N <sub>2</sub> O | -1.184335417          |

**Table S4. The orbitrap result of series 2.**

| <b>N</b>  | <b>Experimental m/z</b> | <b>Calculated m/z</b> | <b>Composition</b>                               | <b>Accuracy (ppm)</b> |
|-----------|-------------------------|-----------------------|--------------------------------------------------|-----------------------|
| <b>9</b>  | 345.23592               | 345.23645             | C <sub>21</sub> H <sub>33</sub> N <sub>2</sub> S | -1.53517973           |
| <b>10</b> | 359.25158               | 359.25210             | C <sub>22</sub> H <sub>35</sub> N <sub>2</sub> S | -1.447451525          |
| <b>11</b> | 373.26729               | 373.26775             | C <sub>23</sub> H <sub>37</sub> N <sub>2</sub> S | -1.232359345          |
| <b>12</b> | 387.28297               | 387.28340             | C <sub>24</sub> H <sub>39</sub> N <sub>2</sub> S | -1.11029804           |
| <b>13</b> | 401.29868               | 401.29905             | C <sub>25</sub> H <sub>41</sub> N <sub>2</sub> S | -0.922005671          |
| <b>14</b> | 415.31431               | 415.31470             | C <sub>26</sub> H <sub>43</sub> N <sub>2</sub> S | -0.939046944          |



**Table S5. The orbitrap result of series 3.**

| <b>N</b>  | <b>Experimental m/z</b> | <b>Calculated m/z</b> | <b>Composition</b>                               | <b>Accuracy (ppm)</b> |
|-----------|-------------------------|-----------------------|--------------------------------------------------|-----------------------|
| <b>6</b>  | 329.20455               | 329.20514             | C <sub>20</sub> H <sub>29</sub> N <sub>2</sub> S | -1.79219559           |
| <b>7</b>  | 343.22030               | 343.22080             | C <sub>21</sub> H <sub>31</sub> N <sub>2</sub> S | -1.456788167          |
| <b>8</b>  | 357.23594               | 357.23645             | C <sub>22</sub> H <sub>33</sub> N <sub>2</sub> S | -1.427625876          |
| <b>9</b>  | 371.25174               | 371.25210             | C <sub>23</sub> H <sub>35</sub> N <sub>2</sub> S | -0.969691485          |
| <b>10</b> | 385.26723               | 385.26775             | C <sub>24</sub> H <sub>37</sub> N <sub>2</sub> S | -1.349710688          |
| <b>11</b> | 399.28310               | 399.28340             | C <sub>25</sub> H <sub>39</sub> N <sub>2</sub> S | -0.751346036          |

**Table S6. The orbitrap result of series 4.**

| <b>N</b>  | <b>Experimental m/z</b> | <b>Calculated m/z</b> | <b>Composition</b>                                | <b>Accuracy (ppm)</b> |
|-----------|-------------------------|-----------------------|---------------------------------------------------|-----------------------|
| <b>10</b> | 451.27955               | 451.27831             | C <sub>28</sub> H <sub>39</sub> N <sub>2</sub> OS | 2.747750053           |
| <b>11</b> | 465.29411               | 465.29396             | C <sub>29</sub> H <sub>41</sub> N <sub>2</sub> OS | 0.322376847           |
| <b>12</b> | 479.30943               | 479.30961             | C <sub>30</sub> H <sub>43</sub> N <sub>2</sub> OS | -0.375540144          |
| <b>13</b> | 493.32497               | 493.32526             | C <sub>31</sub> H <sub>45</sub> N <sub>2</sub> OS | -0.587847458          |
| <b>14</b> | 507.34077               | 507.34091             | C <sub>32</sub> H <sub>47</sub> N <sub>2</sub> OS | -0.275948573          |
| <b>15</b> | 521.35629               | 521.35656             | C <sub>33</sub> H <sub>49</sub> N <sub>2</sub> OS | -0.51787974           |
| <b>16</b> | 535.37194               | 535.37221             | C <sub>34</sub> H <sub>51</sub> N <sub>2</sub> OS | -0.50432203           |
| <b>17</b> | 549.38777               | 549.38786             | C <sub>35</sub> H <sub>53</sub> N <sub>2</sub> OS | -0.163818691          |

**Table S7. The orbitrap result of series 5.**

| <b>N</b>  | <b>Experimental m/z</b> | <b>Calculated m/z</b> | <b>Composition</b>                                | <b>Accuracy (ppm)</b> |
|-----------|-------------------------|-----------------------|---------------------------------------------------|-----------------------|
| <b>9</b>  | 463.27800               | 463.27831             | C <sub>29</sub> H <sub>39</sub> N <sub>2</sub> OS | -0.669144213          |
| <b>10</b> | 477.29366               | 477.29396             | C <sub>30</sub> H <sub>41</sub> N <sub>2</sub> OS | -0.628543466          |
| <b>11</b> | 491.30917               | 491.30961             | C <sub>31</sub> H <sub>43</sub> N <sub>2</sub> OS | -0.895565629          |
| <b>12</b> | 505.32479               | 505.32526             | C <sub>32</sub> H <sub>45</sub> N <sub>2</sub> OS | -0.930094015          |
| <b>13</b> | 519.34062               | 519.34091             | C <sub>33</sub> H <sub>47</sub> N <sub>2</sub> OS | -0.558400069          |
| <b>14</b> | 533.35642               | 533.35656             | C <sub>34</sub> H <sub>49</sub> N <sub>2</sub> OS | -0.262488569          |
| <b>15</b> | 547.37206               | 547.37221             | C <sub>35</sub> H <sub>51</sub> N <sub>2</sub> OS | -0.274036565          |

**Table S3.** Crystal data and structure refinement for [C<sub>12</sub>N<sub>2</sub>H<sub>14</sub>Br][PF<sub>6</sub>].

|                                         |                                                                                                                                                         |
|-----------------------------------------|---------------------------------------------------------------------------------------------------------------------------------------------------------|
| Identification code                     | uvic1410                                                                                                                                                |
| Empirical formula                       | C <sub>12</sub> H <sub>14</sub> BrF <sub>6</sub> N <sub>2</sub> P                                                                                       |
| Formula weight                          | 411.13                                                                                                                                                  |
| Temperature                             | 120(2) K                                                                                                                                                |
| Wavelength                              | 0.71073 Å                                                                                                                                               |
| Crystal system                          | Orthorhombic                                                                                                                                            |
| Space group                             | P2 <sub>1</sub> 2 <sub>1</sub> 2 <sub>1</sub>                                                                                                           |
| Unit cell dimensions                    | $a = 8.3093(6) \text{ \AA}$ $\alpha = 90^\circ$<br>$b = 10.6750(8) \text{ \AA}$ $\beta = 90^\circ$<br>$c = 16.8309(13) \text{ \AA}$ $\gamma = 90^\circ$ |
| Volume                                  | 1492.93(19) Å <sup>3</sup>                                                                                                                              |
| Z                                       | 4                                                                                                                                                       |
| Density (calculated)                    | 1.829 g.cm <sup>-3</sup>                                                                                                                                |
| Absorption coefficient ( $\mu$ )        | 2.922 mm <sup>-1</sup>                                                                                                                                  |
| F(000)                                  | 816                                                                                                                                                     |
| Crystal color, habit                    | colourless, tablet                                                                                                                                      |
| Crystal size                            | 0.200 × 0.090 × 0.060 mm <sup>3</sup>                                                                                                                   |
| $\theta$ range for data collection      | 2.259 to 28.493°                                                                                                                                        |
| Index ranges                            | -10 ≤ h ≤ 11, -14 ≤ k ≤ 14, -22 ≤ l ≤ 21                                                                                                                |
| Reflections collected                   | 26499                                                                                                                                                   |
| Independent reflections                 | 3765 [R <sub>int</sub> = 0.0348]                                                                                                                        |
| Completeness to $\theta = 25.242^\circ$ | 100.0 %                                                                                                                                                 |
| Absorption correction                   | Numerical                                                                                                                                               |
| Max. and min. transmission              | 0.9363 and 0.7187                                                                                                                                       |
| Refinement method                       | Full-matrix least-squares on F <sup>2</sup>                                                                                                             |
| Data / restraints / parameters          | 3765 / 0 / 200                                                                                                                                          |
| Goodness-of-fit on F <sup>2</sup>       | 1.036                                                                                                                                                   |
| Final R indices [ $I > 2\sigma(I)$ ]    | R <sub>1</sub> = 0.0221, wR <sub>2</sub> = 0.0505                                                                                                       |
| R indices (all data)                    | R <sub>1</sub> = 0.0255, wR <sub>2</sub> = 0.0516                                                                                                       |
| Absolute structure parameter            | 0.008(3)                                                                                                                                                |
| Extinction coefficient                  | n/a                                                                                                                                                     |
| Largest diff. peak and hole             | 0.326 and -0.208 e <sup>-</sup> .Å <sup>-3</sup>                                                                                                        |

**Table S5.** Atomic coordinates and equivalent isotropic displacement parameters ( $\text{\AA}^2$ ) for  $[\text{C}_{12}\text{N}_2\text{H}_{14}\text{Br}][\text{PF}_6]$ .  $U(\text{eq})$  is defined as one third of the trace of the orthogonalized  $U_{ij}$  tensor.

|        | x           | y           | z           | $U(\text{eq})$ |
|--------|-------------|-------------|-------------|----------------|
| Br(1)  | -0.18657(3) | 0.60389(3)  | 0.43860(2)  | 0.026(1)       |
| N(1)   | 0.5857(3)   | 0.2976(2)   | 0.57922(12) | 0.017(1)       |
| N(2)   | 0.6362(3)   | 0.2148(2)   | 0.69274(13) | 0.020(1)       |
| C(1)   | 0.5663(3)   | 0.1959(2)   | 0.62354(16) | 0.019(1)       |
| C(2)   | 0.6706(3)   | 0.3844(2)   | 0.62240(16) | 0.024(1)       |
| C(3)   | 0.7020(4)   | 0.3319(3)   | 0.69358(16) | 0.026(1)       |
| C(4)   | 0.5201(3)   | 0.3184(3)   | 0.49966(15) | 0.020(1)       |
| C(5)   | 0.3869(3)   | 0.4139(2)   | 0.49992(14) | 0.015(1)       |
| C(6)   | 0.3694(3)   | 0.4941(2)   | 0.43569(15) | 0.017(1)       |
| C(7)   | 0.2439(3)   | 0.5791(2)   | 0.43408(15) | 0.018(1)       |
| C(8)   | 0.1345(3)   | 0.5859(2)   | 0.49608(14) | 0.015(1)       |
| C(9)   | 0.1523(3)   | 0.5057(2)   | 0.56048(15) | 0.019(1)       |
| C(10)  | 0.2777(3)   | 0.4208(2)   | 0.56229(15) | 0.018(1)       |
| C(11)  | -0.0002(3)  | 0.6777(3)   | 0.49382(16) | 0.022(1)       |
| C(12)  | 0.6420(4)   | 0.1238(3)   | 0.75815(18) | 0.034(1)       |
| P(1)   | 0.13988(8)  | 0.19007(6)  | 0.75326(4)  | 0.018(1)       |
| F(1)   | 0.0167(2)   | 0.26263(17) | 0.80875(10) | 0.031(1)       |
| F(2)   | 0.2477(2)   | 0.31241(15) | 0.74599(10) | 0.036(1)       |
| F(3)   | 0.0354(2)   | 0.06624(16) | 0.76073(11) | 0.037(1)       |
| F(4)   | 0.2403(2)   | 0.14986(15) | 0.83029(10) | 0.031(1)       |
| F(5)   | 0.0405(2)   | 0.23068(18) | 0.67689(9)  | 0.036(1)       |
| F(6)   | 0.2634(2)   | 0.11642(19) | 0.69785(11) | 0.041(1)       |
| H(1A)  | 0.5113      | 0.1219      | 0.6079      | 0.023          |
| H(2A)  | 0.7014      | 0.4658      | 0.6054      | 0.029          |
| H(3A)  | 0.7591      | 0.3694      | 0.7363      | 0.031          |
| H(4A)  | 0.4784      | 0.2382      | 0.4785      | 0.024          |
| H(4B)  | 0.6073      | 0.3473      | 0.4640      | 0.024          |
| H(6A)  | 0.4436      | 0.4906      | 0.3928      | 0.020          |
| H(7A)  | 0.2325      | 0.6336      | 0.3898      | 0.022          |
| H(9A)  | 0.0780      | 0.5093      | 0.6034      | 0.022          |
| H(10A) | 0.2894      | 0.3666      | 0.6067      | 0.021          |
| H(11A) | 0.0348      | 0.7545      | 0.4658      | 0.026          |
| H(11B) | -0.0310     | 0.7011      | 0.5487      | 0.026          |
| H(12A) | 0.5720      | 0.0526      | 0.7457      | 0.050          |
| H(12B) | 0.6052      | 0.1639      | 0.8073      | 0.050          |
| H(12C) | 0.7528      | 0.0943      | 0.7651      | 0.050          |

**Table S6.** Anisotropic displacement parameters ( $\text{\AA}^2$ ) for  $[\text{C}_{12}\text{N}_2\text{H}_{14}\text{Br}][\text{PF}_6]$ . The anisotropic displacement factor exponent takes the form:  $-2\pi^2[h^2a^2U_{11} + \dots + 2hka^*b^*U_{12}]$ .

|       | $U_{11}$   | $U_{22}$   | $U_{33}$   | $U_{23}$    | $U_{13}$    | $U_{12}$    |
|-------|------------|------------|------------|-------------|-------------|-------------|
| Br(1) | 0.0193(1)  | 0.0261(1)  | 0.0314(1)  | -0.0063(1)  | -0.0067(1)  | 0.0026(1)   |
| N(1)  | 0.0180(11) | 0.0162(10) | 0.0171(11) | -0.0014(8)  | -0.0031(8)  | 0.0019(9)   |
| N(2)  | 0.0183(11) | 0.0206(11) | 0.0205(10) | 0.0032(9)   | -0.0020(9)  | 0.0033(9)   |
| C(1)  | 0.0171(13) | 0.0155(12) | 0.0255(13) | -0.0028(10) | 0.0001(10)  | 0.0033(10)  |
| C(2)  | 0.0241(13) | 0.0166(12) | 0.0316(13) | -0.0006(10) | -0.0077(11) | -0.0044(13) |
| C(3)  | 0.0236(15) | 0.0269(14) | 0.0276(14) | -0.0037(11) | -0.0091(12) | -0.0013(13) |
| C(4)  | 0.0223(13) | 0.0244(14) | 0.0143(11) | -0.0040(11) | -0.0014(10) | 0.0058(11)  |
| C(5)  | 0.0156(11) | 0.0160(12) | 0.0136(10) | -0.0037(9)  | -0.0014(9)  | -0.0012(10) |
| C(6)  | 0.0162(11) | 0.0227(12) | 0.0119(10) | 0.0000(10)  | 0.0038(10)  | -0.0036(9)  |
| C(7)  | 0.0210(12) | 0.0178(12) | 0.0154(11) | 0.0016(10)  | -0.0025(10) | -0.0037(9)  |
| C(8)  | 0.0167(11) | 0.0137(12) | 0.0155(11) | -0.0041(9)  | -0.0044(9)  | 0.0002(9)   |
| C(9)  | 0.0181(13) | 0.0254(12) | 0.0120(10) | -0.0031(10) | 0.0033(10)  | -0.0022(10) |
| C(10) | 0.0202(13) | 0.0193(12) | 0.0132(10) | 0.0017(10)  | 0.0010(10)  | -0.0007(9)  |
| C(11) | 0.0197(14) | 0.0214(13) | 0.0235(13) | -0.0073(11) | -0.0063(11) | 0.0010(11)  |
| C(12) | 0.0303(16) | 0.0385(18) | 0.0317(15) | 0.0183(14)  | -0.0021(13) | 0.0044(13)  |
| P(1)  | 0.0210(3)  | 0.0191(3)  | 0.0131(3)  | -0.0030(3)  | 0.0029(2)   | -0.0017(3)  |
| F(1)  | 0.0317(10) | 0.0412(10) | 0.0188(7)  | -0.0074(7)  | 0.0011(7)   | 0.0159(8)   |
| F(2)  | 0.0574(12) | 0.0307(9)  | 0.0205(8)  | -0.0014(7)  | 0.0013(8)   | -0.0229(8)  |
| F(3)  | 0.0431(11) | 0.0314(10) | 0.0374(10) | -0.0050(8)  | 0.0087(9)   | -0.0192(8)  |
| F(4)  | 0.0372(10) | 0.0268(8)  | 0.0292(9)  | 0.0021(7)   | -0.0098(7)  | 0.0107(8)   |
| F(5)  | 0.0466(11) | 0.0478(11) | 0.0153(8)  | -0.0018(8)  | -0.0090(8)  | -0.0008(10) |
| F(6)  | 0.0303(9)  | 0.0512(12) | 0.0413(10) | -0.0250(9)  | 0.0140(8)   | -0.0003(9)  |

**Table S7.** Bond lengths [Å] for [C<sub>12</sub>N<sub>2</sub>H<sub>14</sub>Br][PF<sub>6</sub>].

| atom-atom    | distance   | atom-atom    | distance   |
|--------------|------------|--------------|------------|
| Br(1)-C(11)  | 1.971(3)   | N(1)-C(1)    | 1.327(3)   |
| N(1)-C(2)    | 1.373(3)   | N(1)-C(4)    | 1.462(3)   |
| N(2)-C(1)    | 1.317(3)   | N(2)-C(3)    | 1.364(4)   |
| N(2)-C(12)   | 1.469(3)   | C(2)-C(3)    | 1.348(4)   |
| C(4)-C(5)    | 1.505(4)   | C(5)-C(6)    | 1.387(3)   |
| C(5)-C(10)   | 1.389(3)   | C(6)-C(7)    | 1.382(4)   |
| C(7)-C(8)    | 1.386(4)   | C(8)-C(9)    | 1.389(3)   |
| C(8)-C(11)   | 1.488(3)   | C(9)-C(10)   | 1.382(3)   |
| P(1)-F(3)    | 1.5863(18) | P(1)-F(1)    | 1.5873(17) |
| P(1)-F(5)    | 1.5882(18) | P(1)-F(2)    | 1.5887(17) |
| P(1)-F(6)    | 1.5940(18) | P(1)-F(4)    | 1.6004(18) |
| C(1)-H(1A)   | 0.9500     | C(2)-H(2A)   | 0.9500     |
| C(3)-H(3A)   | 0.9500     | C(4)-H(4A)   | 0.9900     |
| C(4)-H(4B)   | 0.9900     | C(6)-H(6A)   | 0.9500     |
| C(7)-H(7A)   | 0.9500     | C(9)-H(9A)   | 0.9500     |
| C(10)-H(10A) | 0.9500     | C(11)-H(11A) | 0.9900     |
| C(11)-H(11B) | 0.9900     | C(12)-H(12A) | 0.9800     |
| C(12)-H(12B) | 0.9800     | C(12)-H(12C) | 0.9800     |

Symmetry transformations used to generate equivalent atoms:

**Table S8.** Bond angles [°] for [C<sub>12</sub>N<sub>2</sub>H<sub>14</sub>Br][PF<sub>6</sub>].

| atom-atom-atom      | angle      | atom-atom-atom      | angle      |
|---------------------|------------|---------------------|------------|
| C(1)-N(1)-C(2)      | 108.5(2)   | C(1)-N(1)-C(4)      | 126.4(2)   |
| C(2)-N(1)-C(4)      | 125.0(2)   | C(1)-N(2)-C(3)      | 109.0(2)   |
| C(1)-N(2)-C(12)     | 125.2(2)   | C(3)-N(2)-C(12)     | 125.8(2)   |
| N(2)-C(1)-N(1)      | 108.6(2)   | C(3)-C(2)-N(1)      | 106.8(2)   |
| C(2)-C(3)-N(2)      | 107.1(2)   | N(1)-C(4)-C(5)      | 112.0(2)   |
| C(6)-C(5)-C(10)     | 119.2(2)   | C(6)-C(5)-C(4)      | 119.5(2)   |
| C(10)-C(5)-C(4)     | 121.2(2)   | C(7)-C(6)-C(5)      | 120.0(2)   |
| C(6)-C(7)-C(8)      | 121.0(2)   | C(7)-C(8)-C(9)      | 119.0(2)   |
| C(7)-C(8)-C(11)     | 120.6(2)   | C(9)-C(8)-C(11)     | 120.4(2)   |
| C(10)-C(9)-C(8)     | 120.1(2)   | C(9)-C(10)-C(5)     | 120.7(2)   |
| C(8)-C(11)-Br(1)    | 109.88(17) | F(3)-P(1)-F(1)      | 90.42(10)  |
| F(3)-P(1)-F(5)      | 90.40(11)  | F(1)-P(1)-F(5)      | 90.45(10)  |
| F(3)-P(1)-F(2)      | 178.82(11) | F(1)-P(1)-F(2)      | 90.45(10)  |
| F(5)-P(1)-F(2)      | 90.38(10)  | F(3)-P(1)-F(6)      | 89.28(10)  |
| F(1)-P(1)-F(6)      | 179.64(12) | F(5)-P(1)-F(6)      | 89.76(11)  |
| F(2)-P(1)-F(6)      | 89.84(10)  | F(3)-P(1)-F(4)      | 89.87(10)  |
| F(1)-P(1)-F(4)      | 89.45(9)   | F(5)-P(1)-F(4)      | 179.71(11) |
| F(2)-P(1)-F(4)      | 89.35(10)  | F(6)-P(1)-F(4)      | 90.35(10)  |
| N(2)-C(1)-H(1A)     | 125.7      | N(1)-C(1)-H(1A)     | 125.7      |
| C(3)-C(2)-H(2A)     | 126.6      | N(1)-C(2)-H(2A)     | 126.6      |
| C(2)-C(3)-H(3A)     | 126.4      | N(2)-C(3)-H(3A)     | 126.4      |
| N(1)-C(4)-H(4A)     | 109.2      | C(5)-C(4)-H(4A)     | 109.2      |
| N(1)-C(4)-H(4B)     | 109.2      | C(5)-C(4)-H(4B)     | 109.2      |
| H(4A)-C(4)-H(4B)    | 107.9      | C(7)-C(6)-H(6A)     | 120.0      |
| C(5)-C(6)-H(6A)     | 120.0      | C(6)-C(7)-H(7A)     | 119.5      |
| C(8)-C(7)-H(7A)     | 119.5      | C(10)-C(9)-H(9A)    | 120.0      |
| C(8)-C(9)-H(9A)     | 120.0      | C(9)-C(10)-H(10A)   | 119.6      |
| C(5)-C(10)-H(10A)   | 119.6      | C(8)-C(11)-H(11A)   | 109.7      |
| Br(1)-C(11)-H(11A)  | 109.7      | C(8)-C(11)-H(11B)   | 109.7      |
| Br(1)-C(11)-H(11B)  | 109.7      | H(11A)-C(11)-H(11B) | 108.2      |
| N(2)-C(12)-H(12A)   | 109.5      | N(2)-C(12)-H(12B)   | 109.5      |
| H(12A)-C(12)-H(12B) | 109.5      | N(2)-C(12)-H(12C)   | 109.5      |
| H(12A)-C(12)-H(12C) | 109.5      | H(12B)-C(12)-H(12C) | 109.5      |

Symmetry transformations used to generate equivalent atoms:

**Table S9.** Torsion angles [°] for [C<sub>12</sub>N<sub>2</sub>H<sub>14</sub>Br][PF<sub>6</sub>].

| atom-atom-atom-atom   | angle     | atom-atom-atom-atom   | angle     |
|-----------------------|-----------|-----------------------|-----------|
| C(3)-N(2)-C(1)-N(1)   | 0.3(3)    | C(12)-N(2)-C(1)-N(1)  | -179.6(2) |
| C(2)-N(1)-C(1)-N(2)   | -0.3(3)   | C(4)-N(1)-C(1)-N(2)   | -176.8(2) |
| C(1)-N(1)-C(2)-C(3)   | 0.2(3)    | C(4)-N(1)-C(2)-C(3)   | 176.8(3)  |
| N(1)-C(2)-C(3)-N(2)   | 0.0(3)    | C(1)-N(2)-C(3)-C(2)   | -0.2(3)   |
| C(12)-N(2)-C(3)-C(2)  | 179.7(3)  | C(1)-N(1)-C(4)-C(5)   | 108.9(3)  |
| C(2)-N(1)-C(4)-C(5)   | -67.1(3)  | N(1)-C(4)-C(5)-C(6)   | 145.1(2)  |
| N(1)-C(4)-C(5)-C(10)  | -36.9(3)  | C(10)-C(5)-C(6)-C(7)  | -0.4(4)   |
| C(4)-C(5)-C(6)-C(7)   | 177.7(2)  | C(5)-C(6)-C(7)-C(8)   | 0.2(4)    |
| C(6)-C(7)-C(8)-C(9)   | 0.0(4)    | C(6)-C(7)-C(8)-C(11)  | -180.0(2) |
| C(7)-C(8)-C(9)-C(10)  | 0.1(4)    | C(11)-C(8)-C(9)-C(10) | -179.9(2) |
| C(8)-C(9)-C(10)-C(5)  | -0.3(4)   | C(6)-C(5)-C(10)-C(9)  | 0.5(4)    |
| C(4)-C(5)-C(10)-C(9)  | -177.5(2) | C(7)-C(8)-C(11)-Br(1) | 87.6(3)   |
| C(9)-C(8)-C(11)-Br(1) | -92.3(2)  |                       |           |

Symmetry transformations used to generate equivalent atoms:

**Table S10.** Crystal data and structure refinement for [C<sub>18</sub>N<sub>2</sub>H<sub>18</sub>OH][PF<sub>6</sub>].

|                                         |                                                                                                                                                                  |
|-----------------------------------------|------------------------------------------------------------------------------------------------------------------------------------------------------------------|
| Identification code                     | uvic1520                                                                                                                                                         |
| Empirical formula                       | C <sub>18</sub> H <sub>19</sub> F <sub>6</sub> N <sub>2</sub> OP                                                                                                 |
| Formula weight                          | 424.32                                                                                                                                                           |
| Temperature                             | 120(2) K                                                                                                                                                         |
| Wavelength                              | 0.71073 Å                                                                                                                                                        |
| Crystal system                          | Monoclinic                                                                                                                                                       |
| Space group                             | P2 <sub>1</sub> /n                                                                                                                                               |
| Unit cell dimensions                    | $a = 10.1719(8) \text{ \AA}$ $\alpha = 90^\circ$<br>$b = 17.7909(14) \text{ \AA}$ $\beta = 110.562(3)^\circ$<br>$c = 11.0986(9) \text{ \AA}$ $\gamma = 90^\circ$ |
| Volume                                  | 1880.5(3) Å <sup>3</sup>                                                                                                                                         |
| Z                                       | 4                                                                                                                                                                |
| Density (calculated)                    | 1.499 g.cm <sup>-3</sup>                                                                                                                                         |
| Absorption coefficient ( $\mu$ )        | 0.215 mm <sup>-1</sup>                                                                                                                                           |
| F(000)                                  | 872                                                                                                                                                              |
| Crystal color, habit                    | colorless, tablet                                                                                                                                                |
| Crystal size                            | 0.271 × 0.109 × 0.050 mm <sup>3</sup>                                                                                                                            |
| $\theta$ range for data collection      | 2.270 to 26.619°                                                                                                                                                 |
| Index ranges                            | -11 ≤ h ≤ 12, -22 ≤ k ≤ 22, -13 ≤ l ≤ 13                                                                                                                         |
| Reflections collected                   | 26441                                                                                                                                                            |
| Independent reflections                 | 3932 [R <sub>int</sub> = 0.0563]                                                                                                                                 |
| Completeness to $\theta = 25.242^\circ$ | 100.0 %                                                                                                                                                          |
| Absorption correction                   | Numerical                                                                                                                                                        |
| Max. and min. transmission              | 1.0000 and 0.9382                                                                                                                                                |
| Refinement method                       | Full-matrix least-squares on F <sup>2</sup>                                                                                                                      |
| Data / restraints / parameters          | 3932 / 0 / 254                                                                                                                                                   |
| Goodness-of-fit on F <sup>2</sup>       | 1.038                                                                                                                                                            |
| Final R indices [ $I > 2\sigma(I)$ ]    | R <sub>1</sub> = 0.0555, wR <sub>2</sub> = 0.1341                                                                                                                |
| R indices (all data)                    | R <sub>1</sub> = 0.0882, wR <sub>2</sub> = 0.1521                                                                                                                |
| Extinction coefficient                  | n/a                                                                                                                                                              |
| Largest diff. peak and hole             | 1.087 and -0.547 e <sup>-</sup> .Å <sup>-3</sup>                                                                                                                 |



**Table S11.** Atomic coordinates and equivalent isotropic displacement parameters ( $\text{\AA}^2$ ) for  $[\text{C}_{18}\text{N}_2\text{H}_{18}\text{OH}][\text{PF}_6]$ .  $U(\text{eq})$  is defined as one third of the trace of the orthogonalized  $U_{ij}$  tensor.

|       | x          | y           | z           | U(eq)    |
|-------|------------|-------------|-------------|----------|
| O(1)  | 0.0664(2)  | 0.35548(12) | 0.03279(18) | 0.026(1) |
| N(1)  | 0.6917(2)  | 0.56933(13) | 0.5615(2)   | 0.023(1) |
| N(2)  | 0.6002(2)  | 0.57743(13) | 0.3559(2)   | 0.023(1) |
| C(1)  | 0.7151(3)  | 0.55871(16) | 0.4531(3)   | 0.023(1) |
| C(2)  | 0.5578(3)  | 0.59606(17) | 0.5335(3)   | 0.028(1) |
| C(3)  | 0.5001(3)  | 0.60136(17) | 0.4049(3)   | 0.027(1) |
| C(4)  | 0.7933(3)  | 0.55660(19) | 0.6904(3)   | 0.032(1) |
| C(5)  | 0.5840(3)  | 0.57426(18) | 0.2188(3)   | 0.029(1) |
| C(6)  | 0.4672(3)  | 0.52195(17) | 0.1447(3)   | 0.024(1) |
| C(7)  | 0.3356(3)  | 0.55130(17) | 0.0743(3)   | 0.026(1) |
| C(8)  | 0.2277(3)  | 0.50373(17) | 0.0060(3)   | 0.025(1) |
| C(9)  | 0.2484(3)  | 0.42677(17) | 0.0076(3)   | 0.023(1) |
| C(10) | 0.3797(3)  | 0.39793(17) | 0.0770(3)   | 0.025(1) |
| C(11) | 0.4884(3)  | 0.44542(17) | 0.1444(3)   | 0.025(1) |
| C(12) | 0.1283(3)  | 0.37558(18) | -0.0606(3)  | 0.027(1) |
| C(13) | -0.0560(3) | 0.31492(16) | -0.0090(3)  | 0.023(1) |
| C(14) | -0.1132(3) | 0.29853(17) | 0.0841(3)   | 0.026(1) |
| C(15) | -0.2394(3) | 0.26037(17) | 0.0506(3)   | 0.027(1) |
| C(16) | -0.3094(3) | 0.23935(17) | -0.0764(3)  | 0.029(1) |
| C(17) | -0.2503(3) | 0.25554(16) | -0.1676(3)  | 0.027(1) |
| C(18) | -0.1234(3) | 0.29322(16) | -0.1358(3)  | 0.025(1) |
| P(1)  | 0.85285(9) | 0.34884(5)  | 0.49272(8)  | 0.031(1) |
| F(1)  | 0.8499(2)  | 0.28843(14) | 0.38719(19) | 0.053(1) |
| F(2)  | 0.7555(2)  | 0.29755(13) | 0.5425(2)   | 0.055(1) |
| F(3)  | 0.8574(3)  | 0.40953(12) | 0.6010(2)   | 0.058(1) |
| F(4)  | 0.7219(2)  | 0.39176(15) | 0.3977(2)   | 0.063(1) |
| F(5)  | 0.9858(2)  | 0.30982(15) | 0.5921(2)   | 0.062(1) |
| F(6)  | 0.9532(3)  | 0.40038(15) | 0.4461(3)   | 0.071(1) |
| H(1)  | 0.8000     | 0.5407      | 0.4460      | 0.028    |
| H(2)  | 0.5142     | 0.6085      | 0.5938      | 0.034    |
| H(3)  | 0.4080     | 0.6183      | 0.3569      | 0.032    |
| H(4A) | 0.8865     | 0.5481      | 0.6853      | 0.049    |
| H(4B) | 0.7654     | 0.5124      | 0.7283      | 0.049    |
| H(4C) | 0.7964     | 0.6007      | 0.7442      | 0.049    |
| H(5A) | 0.6731     | 0.5570      | 0.2108      | 0.034    |

|        |         |        |         |       |
|--------|---------|--------|---------|-------|
| H(5B)  | 0.5639  | 0.6253 | 0.1813  | 0.034 |
| H(7)   | 0.3201  | 0.6040 | 0.0733  | 0.031 |
| H(8)   | 0.1385  | 0.5241 | -0.0427 | 0.030 |
| H(10A) | 0.3952  | 0.3452 | 0.0783  | 0.030 |
| H(11A) | 0.5784  | 0.4251 | 0.1909  | 0.030 |
| H(12A) | 0.0590  | 0.4016 | -0.1347 | 0.032 |
| H(12B) | 0.1622  | 0.3302 | -0.0925 | 0.032 |
| H(14A) | -0.0659 | 0.3134 | 0.1708  | 0.031 |
| H(15A) | -0.2783 | 0.2485 | 0.1146  | 0.033 |
| H(16A) | -0.3971 | 0.2141 | -0.1001 | 0.035 |
| H(17A) | -0.2976 | 0.2405 | -0.2542 | 0.032 |
| H(18A) | -0.0835 | 0.3039 | -0.1995 | 0.031 |

**Table S12.** Anisotropic displacement parameters ( $\text{\AA}^2$ ) for  $[\text{C}_{18}\text{N}_2\text{H}_{18}\text{OH}][\text{PF}_6]$ . The anisotropic displacement factor exponent takes the form:  $-2\pi^2[h^2a^2U_{11} + \dots + 2hka^*b^*U_{12}]$ .

|       | $U_{11}$   | $U_{22}$   | $U_{33}$   | $U_{23}$    | $U_{13}$   | $U_{12}$    |
|-------|------------|------------|------------|-------------|------------|-------------|
| O(1)  | 0.0227(10) | 0.0376(12) | 0.0175(9)  | -0.0010(9)  | 0.0070(8)  | -0.0086(9)  |
| N(1)  | 0.0259(13) | 0.0268(13) | 0.0174(11) | -0.0029(10) | 0.0080(10) | -0.0039(10) |
| N(2)  | 0.0209(12) | 0.0288(13) | 0.0178(11) | -0.0017(10) | 0.0062(10) | -0.0031(10) |
| C(1)  | 0.0241(15) | 0.0243(14) | 0.0222(14) | -0.0029(11) | 0.0103(12) | -0.0031(12) |
| C(2)  | 0.0274(16) | 0.0328(17) | 0.0283(16) | -0.0066(13) | 0.0149(13) | -0.0034(13) |
| C(3)  | 0.0227(15) | 0.0284(16) | 0.0305(16) | -0.0030(12) | 0.0108(13) | -0.0010(12) |
| C(4)  | 0.0365(18) | 0.0398(18) | 0.0174(14) | -0.0017(13) | 0.0051(13) | -0.0028(15) |
| C(5)  | 0.0280(16) | 0.0381(18) | 0.0186(14) | -0.0002(13) | 0.0072(12) | -0.0087(13) |
| C(6)  | 0.0215(15) | 0.0358(16) | 0.0149(13) | -0.0008(12) | 0.0062(11) | -0.0061(12) |
| C(7)  | 0.0297(16) | 0.0249(15) | 0.0239(14) | -0.0011(12) | 0.0102(13) | -0.0015(12) |
| C(8)  | 0.0205(14) | 0.0335(16) | 0.0208(14) | 0.0017(12)  | 0.0060(12) | 0.0012(12)  |
| C(9)  | 0.0231(15) | 0.0327(16) | 0.0156(13) | -0.0013(11) | 0.0082(11) | -0.0046(12) |
| C(10) | 0.0282(16) | 0.0266(15) | 0.0215(14) | 0.0029(12)  | 0.0099(12) | 0.0015(12)  |
| C(11) | 0.0221(15) | 0.0336(16) | 0.0196(14) | 0.0040(12)  | 0.0070(12) | 0.0025(12)  |
| C(12) | 0.0261(16) | 0.0338(16) | 0.0210(14) | -0.0012(12) | 0.0083(12) | -0.0050(13) |
| C(13) | 0.0196(14) | 0.0239(14) | 0.0229(14) | 0.0011(11)  | 0.0058(11) | -0.0013(11) |
| C(14) | 0.0247(15) | 0.0298(16) | 0.0214(14) | 0.0005(12)  | 0.0059(12) | 0.0006(12)  |
| C(15) | 0.0282(16) | 0.0301(16) | 0.0252(15) | 0.0043(12)  | 0.0112(13) | 0.0014(13)  |
| C(16) | 0.0249(16) | 0.0292(16) | 0.0316(16) | 0.0017(13)  | 0.0072(13) | -0.0037(13) |
| C(17) | 0.0272(16) | 0.0254(15) | 0.0237(14) | -0.0012(12) | 0.0033(12) | -0.0042(12) |
| C(18) | 0.0274(15) | 0.0281(15) | 0.0207(14) | 0.0000(12)  | 0.0082(12) | -0.0020(12) |
| P(1)  | 0.0277(4)  | 0.0376(5)  | 0.0303(4)  | 0.0076(4)   | 0.0127(3)  | 0.0085(4)   |
| F(1)  | 0.0530(13) | 0.0719(15) | 0.0376(11) | -0.0165(11) | 0.0197(10) | -0.0041(11) |
| F(2)  | 0.0654(15) | 0.0610(14) | 0.0504(13) | 0.0003(11)  | 0.0343(12) | -0.0145(12) |
| F(3)  | 0.0747(16) | 0.0457(13) | 0.0567(14) | -0.0073(11) | 0.0263(12) | 0.0129(12)  |
| F(4)  | 0.0443(13) | 0.0909(19) | 0.0489(13) | 0.0207(13)  | 0.0087(11) | 0.0280(12)  |
| F(5)  | 0.0468(13) | 0.0923(19) | 0.0411(12) | 0.0000(12)  | 0.0077(10) | 0.0325(12)  |
| F(6)  | 0.0657(17) | 0.0780(18) | 0.0830(18) | 0.0114(14)  | 0.0423(15) | -0.0186(13) |

**Table S13.** Bond lengths [Å] for [C<sub>18</sub>N<sub>2</sub>H<sub>18</sub>OH][PF<sub>6</sub>].

| atom-atom    | distance | atom-atom    | distance |
|--------------|----------|--------------|----------|
| O(1)-C(13)   | 1.371(3) | O(1)-C(12)   | 1.435(3) |
| N(1)-C(1)    | 1.319(3) | N(1)-C(2)    | 1.372(4) |
| N(1)-C(4)    | 1.459(4) | N(2)-C(1)    | 1.325(4) |
| N(2)-C(3)    | 1.380(4) | N(2)-C(5)    | 1.472(3) |
| C(2)-C(3)    | 1.343(4) | C(5)-C(6)    | 1.506(4) |
| C(6)-C(11)   | 1.379(4) | C(6)-C(7)    | 1.392(4) |
| C(7)-C(8)    | 1.383(4) | C(8)-C(9)    | 1.385(4) |
| C(9)-C(10)   | 1.385(4) | C(9)-C(12)   | 1.498(4) |
| C(10)-C(11)  | 1.384(4) | C(13)-C(14)  | 1.383(4) |
| C(13)-C(18)  | 1.387(4) | C(14)-C(15)  | 1.383(4) |
| C(15)-C(16)  | 1.389(4) | C(16)-C(17)  | 1.377(4) |
| C(17)-C(18)  | 1.386(4) | P(1)-F(5)    | 1.575(2) |
| P(1)-F(4)    | 1.576(2) | P(1)-F(1)    | 1.582(2) |
| P(1)-F(2)    | 1.582(2) | P(1)-F(6)    | 1.588(2) |
| P(1)-F(3)    | 1.604(2) | C(1)-H(1)    | 0.9500   |
| C(2)-H(2)    | 0.9500   | C(3)-H(3)    | 0.9500   |
| C(4)-H(4A)   | 0.9800   | C(4)-H(4B)   | 0.9800   |
| C(4)-H(4C)   | 0.9800   | C(5)-H(5A)   | 0.9900   |
| C(5)-H(5B)   | 0.9900   | C(7)-H(7)    | 0.9500   |
| C(8)-H(8)    | 0.9500   | C(10)-H(10A) | 0.9500   |
| C(11)-H(11A) | 0.9500   | C(12)-H(12A) | 0.9900   |
| C(12)-H(12B) | 0.9900   | C(14)-H(14A) | 0.9500   |
| C(15)-H(15A) | 0.9500   | C(16)-H(16A) | 0.9500   |
| C(17)-H(17A) | 0.9500   | C(18)-H(18A) | 0.9500   |

Symmetry transformations used to generate equivalent atoms:

**Table S14.** Bond angles [°] for [C<sub>18</sub>N<sub>2</sub>H<sub>18</sub>OH][PF<sub>6</sub>].

| atom-atom-atom     | angle      | atom-atom-atom     | angle      |
|--------------------|------------|--------------------|------------|
| C(13)-O(1)-C(12)   | 117.6(2)   | C(1)-N(1)-C(2)     | 109.0(2)   |
| C(1)-N(1)-C(4)     | 125.4(3)   | C(2)-N(1)-C(4)     | 125.5(2)   |
| C(1)-N(2)-C(3)     | 108.5(2)   | C(1)-N(2)-C(5)     | 125.4(2)   |
| C(3)-N(2)-C(5)     | 126.1(2)   | N(1)-C(1)-N(2)     | 108.5(2)   |
| C(3)-C(2)-N(1)     | 107.1(3)   | C(2)-C(3)-N(2)     | 106.9(3)   |
| N(2)-C(5)-C(6)     | 111.6(2)   | C(11)-C(6)-C(7)    | 119.3(3)   |
| C(11)-C(6)-C(5)    | 121.1(3)   | C(7)-C(6)-C(5)     | 119.5(3)   |
| C(8)-C(7)-C(6)     | 120.0(3)   | C(7)-C(8)-C(9)     | 120.7(3)   |
| C(8)-C(9)-C(10)    | 119.1(3)   | C(8)-C(9)-C(12)    | 120.1(3)   |
| C(10)-C(9)-C(12)   | 120.8(3)   | C(11)-C(10)-C(9)   | 120.4(3)   |
| C(6)-C(11)-C(10)   | 120.5(3)   | O(1)-C(12)-C(9)    | 105.9(2)   |
| O(1)-C(13)-C(14)   | 115.4(2)   | O(1)-C(13)-C(18)   | 123.8(2)   |
| C(14)-C(13)-C(18)  | 120.8(3)   | C(13)-C(14)-C(15)  | 119.8(3)   |
| C(14)-C(15)-C(16)  | 120.1(3)   | C(17)-C(16)-C(15)  | 119.3(3)   |
| C(16)-C(17)-C(18)  | 121.5(3)   | C(17)-C(18)-C(13)  | 118.5(3)   |
| F(5)-P(1)-F(4)     | 176.97(15) | F(5)-P(1)-F(1)     | 90.43(12)  |
| F(4)-P(1)-F(1)     | 92.41(13)  | F(5)-P(1)-F(2)     | 89.45(14)  |
| F(4)-P(1)-F(2)     | 91.56(14)  | F(1)-P(1)-F(2)     | 90.86(13)  |
| F(5)-P(1)-F(6)     | 89.44(15)  | F(4)-P(1)-F(6)     | 89.50(14)  |
| F(1)-P(1)-F(6)     | 89.93(14)  | F(2)-P(1)-F(6)     | 178.65(14) |
| F(5)-P(1)-F(3)     | 88.86(13)  | F(4)-P(1)-F(3)     | 88.29(13)  |
| F(1)-P(1)-F(3)     | 179.29(14) | F(2)-P(1)-F(3)     | 89.07(13)  |
| F(6)-P(1)-F(3)     | 90.13(14)  | N(1)-C(1)-H(1)     | 125.7      |
| N(2)-C(1)-H(1)     | 125.7      | C(3)-C(2)-H(2)     | 126.5      |
| N(1)-C(2)-H(2)     | 126.5      | C(2)-C(3)-H(3)     | 126.6      |
| N(2)-C(3)-H(3)     | 126.6      | N(1)-C(4)-H(4A)    | 109.5      |
| N(1)-C(4)-H(4B)    | 109.5      | H(4A)-C(4)-H(4B)   | 109.5      |
| N(1)-C(4)-H(4C)    | 109.5      | H(4A)-C(4)-H(4C)   | 109.5      |
| H(4B)-C(4)-H(4C)   | 109.5      | N(2)-C(5)-H(5A)    | 109.3      |
| C(6)-C(5)-H(5A)    | 109.3      | N(2)-C(5)-H(5B)    | 109.3      |
| C(6)-C(5)-H(5B)    | 109.3      | H(5A)-C(5)-H(5B)   | 108.0      |
| C(8)-C(7)-H(7)     | 120.0      | C(6)-C(7)-H(7)     | 120.0      |
| C(7)-C(8)-H(8)     | 119.6      | C(9)-C(8)-H(8)     | 119.6      |
| C(11)-C(10)-H(10A) | 119.8      | C(9)-C(10)-H(10A)  | 119.8      |
| C(6)-C(11)-H(11A)  | 119.7      | C(10)-C(11)-H(11A) | 119.7      |
| O(1)-C(12)-H(12A)  | 110.6      | C(9)-C(12)-H(12A)  | 110.6      |

|                     |       |                    |       |
|---------------------|-------|--------------------|-------|
| O(1)-C(12)-H(12B)   | 110.6 | C(9)-C(12)-H(12B)  | 110.6 |
| H(12A)-C(12)-H(12B) | 108.7 | C(13)-C(14)-H(14A) | 120.1 |
| C(15)-C(14)-H(14A)  | 120.1 | C(14)-C(15)-H(15A) | 119.9 |
| C(16)-C(15)-H(15A)  | 119.9 | C(17)-C(16)-H(16A) | 120.4 |
| C(15)-C(16)-H(16A)  | 120.4 | C(16)-C(17)-H(17A) | 119.2 |
| C(18)-C(17)-H(17A)  | 119.2 | C(17)-C(18)-H(18A) | 120.8 |
| C(13)-C(18)-H(18A)  | 120.8 |                    |       |

Symmetry transformations used to generate equivalent atoms:

**Table S15.** Torsion angles [°] for [C<sub>18</sub>N<sub>2</sub>H<sub>18</sub>OH][PF<sub>6</sub>].

| atom-atom-atom-atom     | angle     | atom-atom-atom-atom     | angle     |
|-------------------------|-----------|-------------------------|-----------|
| C(2)-N(1)-C(1)-N(2)     | -0.3(3)   | C(4)-N(1)-C(1)-N(2)     | -178.8(3) |
| C(3)-N(2)-C(1)-N(1)     | 0.4(3)    | C(5)-N(2)-C(1)-N(1)     | 179.4(3)  |
| C(1)-N(2)-C(3)-C(2)     | -0.3(3)   | C(5)-N(2)-C(3)-C(2)     | -179.4(3) |
| N(2)-C(3)-C(2)-N(1)     | 0.1(3)    | C(1)-N(1)-C(2)-C(3)     | 0.1(3)    |
| C(4)-N(1)-C(2)-C(3)     | 178.6(3)  | C(1)-N(2)-C(5)-C(6)     | 119.9(3)  |
| C(3)-N(2)-C(5)-C(6)     | -61.3(4)  | N(2)-C(5)-C(6)-C(11)    | -81.9(3)  |
| N(2)-C(5)-C(6)-C(7)     | 98.5(3)   | C(11)-C(6)-C(7)-C(8)    | 0.5(4)    |
| C(5)-C(6)-C(7)-C(8)     | 180.0(3)  | C(6)-C(7)-C(8)-C(9)     | 0.7(4)    |
| C(7)-C(8)-C(9)-C(10)    | -1.1(4)   | C(7)-C(8)-C(9)-C(12)    | 176.4(3)  |
| C(8)-C(9)-C(10)-C(11)   | 0.4(4)    | C(12)-C(9)-C(10)-C(11)  | -177.1(3) |
| C(7)-C(6)-C(11)-C(10)   | -1.2(4)   | C(5)-C(6)-C(11)-C(10)   | 179.3(3)  |
| C(9)-C(10)-C(11)-C(6)   | 0.7(4)    | C(13)-O(1)-C(12)-C(9)   | 173.2(2)  |
| C(8)-C(9)-C(12)-O(1)    | -91.1(3)  | C(10)-C(9)-C(12)-O(1)   | 86.4(3)   |
| C(12)-O(1)-C(13)-C(14)  | -178.5(3) | C(12)-O(1)-C(13)-C(18)  | -0.8(4)   |
| O(1)-C(13)-C(14)-C(15)  | 177.5(3)  | C(18)-C(13)-C(14)-C(15) | -0.3(4)   |
| C(13)-C(14)-C(15)-C(16) | -0.8(4)   | C(14)-C(15)-C(16)-C(17) | 1.4(5)    |
| C(15)-C(16)-C(17)-C(18) | -0.9(5)   | C(16)-C(17)-C(18)-C(13) | -0.2(4)   |
| O(1)-C(13)-C(18)-C(17)  | -176.8(3) | C(14)-C(13)-C(18)-C(17) | 0.8(4)    |

Symmetry transformations used to generate equivalent atoms:

---

<sup>i</sup> Haynes, W. M. *CRC Handbook of Chemistry and Physics, 96th ed.*; CRC Press, Taylor & Francis Group, Inc.: Abingdon, 2015.
